# Supplementary material for: α-MnO2 nanowire catalysts with ultra-high capacity and extremely low overpotential in lithium–air batteries through tailored surface arrangement
Source: Royal Society of Chemistry journal article supplement (doi:10.1039/c3cp53754d), 2013-01-01
Supplement: c3cp53754d.pdf [file c3cp53754d.pdf]

# Supporting Information for “ $\alpha$ -MnO<sub>2</sub> nanowire catalysts with ultra-high capacity and extremely low overpotential in lithium-air Batteries through tailored surface arrangement”

*Kyeongse Song,<sup>‡,a</sup> Jaepyeong Jung,<sup>‡,a</sup> Yoon-Uk Heo,<sup>b</sup> Yoon Cheol Lee,<sup>a</sup> Kyeongjae Cho<sup>\*c,d</sup>  
and Yong-Mook Kang<sup>\*a</sup>*

<sup>a</sup> Department of Energy and Materials Engineering, Dongguk University-Seoul, Seoul 100-715, Republic of Korea, <sup>b</sup> Research Facility Center, Graduate Institute of Ferrous Technology, Pohang University of Science and Technology Pohang 790-784, Republic of Korea, <sup>c</sup> WCU Multiscale Mechanical Design, School of Mechanical and Aerospace Engineering, Seoul National University, Seoul 151-742, Republic of Korea, <sup>d</sup> Department of Materials Science and Engineering and Department of Physics, University of Texas, Dallas, Richardson, TX 75080, USA

<sup>‡</sup> *These authors contributed equally*, \* Corresponding author E-mail: Kyeongjae Cho; [kjcho@utdallas.edu](mailto:kjcho@utdallas.edu), Yong-Mook Kang; [dake1234@dongguk.edu](mailto:dake1234@dongguk.edu)

## Experiment details

**Preparation of  $\alpha$ -MnO<sub>2</sub> Nanoparticles:**  $\alpha$ -MnO<sub>2</sub> nanoparticles were synthesized by a Sol-gel process where an aqueous solution of KMnO<sub>4</sub> (0.2M) was dropwise added to an aqueous solution of Mn(CH<sub>3</sub>CO<sub>2</sub>)<sub>2</sub> (0.3M) under stirring. The formed precipitate was stirred continuously for 3h before it was removed by filtration, washed, and dried in a vacuum oven at 60 °C overnight. It was subsequently ground into powder and calcined at 300 °C for 3 h to obtain the  $\alpha$ -MnO<sub>2</sub> nanoparticle.<sup>1</sup>

**Preparation of  $\alpha$ -MnO<sub>2</sub> Nanowires:** Nanocrystalline  $\alpha$ -MnO<sub>2</sub> nanowires were synthesized by hydrothermal process a MnSO<sub>4</sub>•H<sub>2</sub>O (0.1 mol) was dissolved in water (30 ml) and KMnO<sub>4</sub> (0.1 mol) was added under stirring at room temperature. The solution was transferred to a Teflon-lined stainless-steel autoclave with a capacity of 100 mL, sealed and maintained at 140 °C for 12h. After cooling to room temperature, the resulting mixture was separated by centrifugation, washed by water, and then dried in a vacuum at 60 °C for 12h to obtain the  $\alpha$ -MnO<sub>2</sub> nanowire.<sup>2</sup>

**Preparation of  $\alpha$ -MnO<sub>2</sub> Nanotubes:** Nanocrystalline  $\alpha$ -MnO<sub>2</sub> nanotubes were synthesized by hydrothermal process HCl (10 mmol) was dissolved in D. I. water (70 ml) and KMnO<sub>4</sub> (2.5 mol) was added under stirring at room temperature. The solution was transferred to a Teflon-lined stainless-steel autoclave with a capacity of 100 mL, sealed and maintained at 140 °C for 12h. After cooling to room temperature, the resulting mixture was separated by centrifugation, washed by water, and then dried in a vacuum at 60 °C for 12h to obtain the  $\alpha$ -MnO<sub>2</sub> nanotube.<sup>3</sup>

**Electrochemical Experiment:** The electrodes were fabricated by mixing each active material of  $\alpha$ -MnO<sub>2</sub>, ketjen black (EC600JD) and PVDF-HFP copolymer with a weight ratio

of 40:45:15 using N-methylpyrrolidone (NMP) as a solvent. The resulting slurries were pasted onto carbon paper (GDL; Gas diffusion layer) and then dried in a vacuum oven at 120 °C for 5 h. The carbon loading of electrodes were 0.3 mg. Swagelok-type cells were assembled in an argon-filled glove box (<1 ppm H<sub>2</sub>O) for electrochemical characterization. Lithium metal foil was used as a counter electrode, glassfiber disk as the separator and 1M LiCF<sub>3</sub>SO<sub>3</sub> in tetraethyleneglycol dimethylether (TEGDME) as the electrolyte. After assembly and sealing, the (assembled/sealed) cell was removed from argon-filled glove box, and then the cell was purged with O<sub>2</sub> gas for 10 minutes at room temperature. Subsequently, the cell was galvanostatically charged and discharged at a various current density at 200 - 5000 mA<sub>g(carbon)</sub><sup>-1</sup> over a range of 2.0 - 4.5 V. For the stabilization of cycling, the cell was also tested using a constant current - constant voltage (CC - CV) mode with potentiostatic steps at 4.2 V under limited capacity condition (1000 mA<sub>g(carbon)</sub><sup>-1</sup>).

**Structural Characterization:** The α-MnO<sub>2</sub> nanomaterials were identified by the X-ray diffraction (XRD; Rigaku D/Max-RB diffractometer, using Cu K<sub>α</sub> radiation at 40 kV and 100 mA), the field emission scanning electron microscopy (FE-SEM; TESCAN MIRA LMH2, operated at 15 kV). TEM specimen was prepared on the carbon holey grid. The specimen was observed in transmission electron microscope (JEOL JEM-2100F). In order to measure the conductivity of the α-MnO<sub>2</sub> nanomaterials, a Jandel four-point probe technique was adopted. Finally, the pore volume and surface area of our α-MnO<sub>2</sub> nanomaterials were estimated by Barret–Joiner–Halenda (BJH) and Brunauer–Emmett–Teller (BET) analyses, respectively.

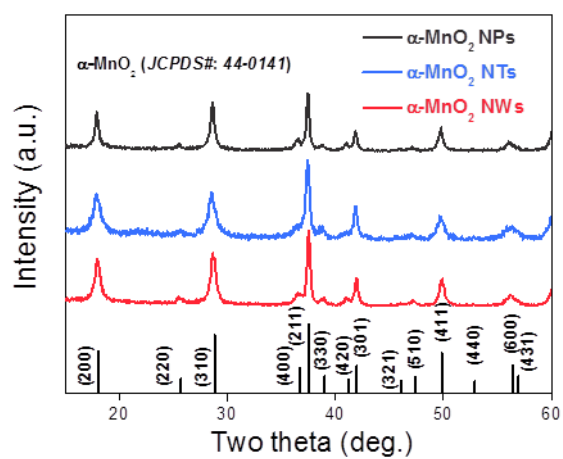

Fig. S1. XRD patterns of  $\alpha$ -MnO<sub>2</sub> NPs,  $\alpha$ -MnO<sub>2</sub> NTs and  $\alpha$ -MnO<sub>2</sub> NWs.

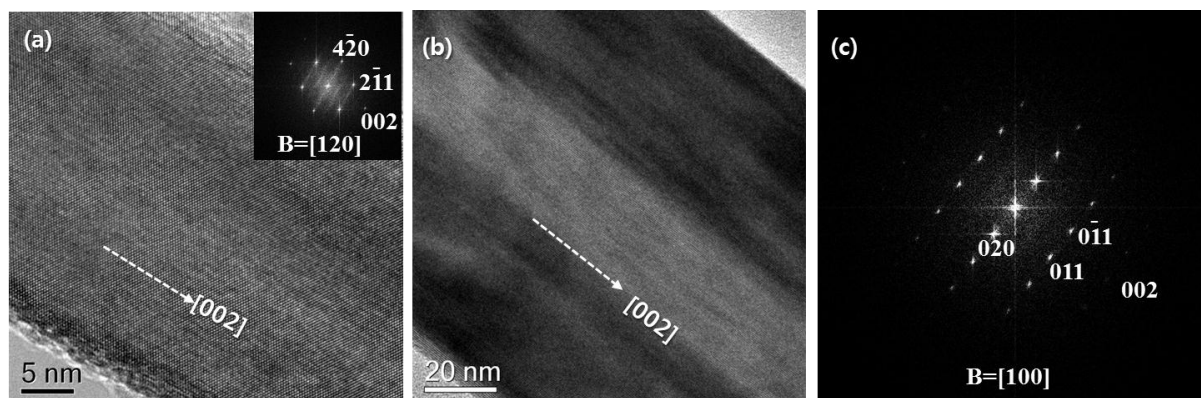

Fig. S2. (a) HRTEM image and FFT in set of a nanowire; growth direction of a nanowire is [002]. (b) HR image and (c) its FFT of a nanotube; growth direction of a nanotube is [002].

Table S1. The atomic concentrations determined by the fitting Mn 2p<sub>3/2</sub> spectra via Gaussian-Lorentz curve fitting.

|                                     | <b>Mn 2p<sub>3/2</sub> atomic concentration %</b> |                        |
|-------------------------------------|---------------------------------------------------|------------------------|
|                                     | <b>Mn<sup>3+</sup></b>                            | <b>Mn<sup>4+</sup></b> |
| <b><i>α</i>-MnO<sub>2</sub> NTs</b> | <b>29.4</b>                                       | <b>70.6</b>            |
| <b><i>α</i>-MnO<sub>2</sub> NWs</b> | <b>33.4</b>                                       | <b>66.6</b>            |

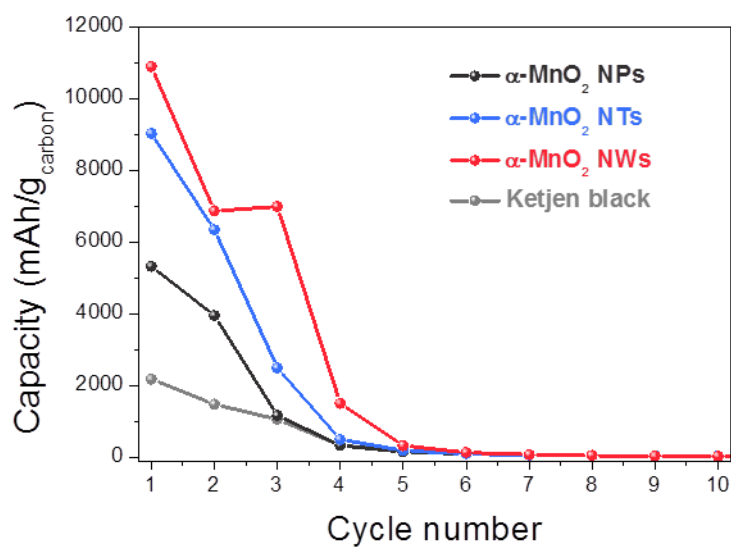

Fig. S3. The electrochemical cyclability of MnO<sub>x</sub> nanomaterial at a current rate of 200 mA g<sub>carbon</sub><sup>-1</sup>.

Table S2. Electrical conductivities, Surface areas, and Pore volume of MnO<sub>x</sub> nanomaterials.

|                                                | Slurry<br>conductivity $\sigma$<br>[S·cm <sup>-1</sup> ] | Surface area<br>[m <sup>2</sup> ·g <sup>-1</sup> ] | Pore volume<br>[cm <sup>3</sup> ·g <sup>-1</sup> ] |
|------------------------------------------------|----------------------------------------------------------|----------------------------------------------------|----------------------------------------------------|
| <b><math>\alpha</math>-MnO<sub>2</sub> NPs</b> | 0.8374                                                   | 174.790                                            | 0.461200                                           |
| <b><math>\alpha</math>-MnO<sub>2</sub> NTs</b> | 0.8487                                                   | 44.085                                             | 0.075460                                           |
| <b><math>\alpha</math>-MnO<sub>2</sub> NWs</b> | 0.8657                                                   | 32.512                                             | 0.050189                                           |



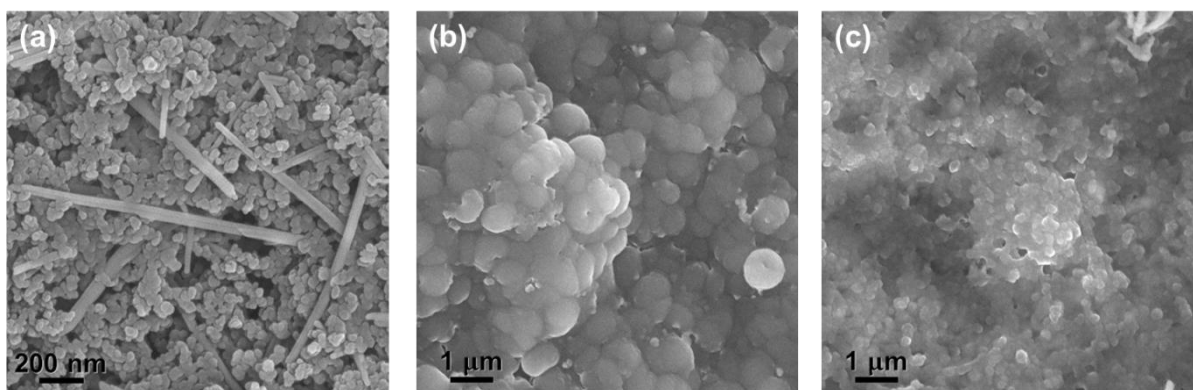

Fig. S4. (a) SEM images of the as-prepared electrode of  $\alpha$ -MnO<sub>2</sub> NWs. (b) SEM image of catalyst-free electrode after first discharge. (c) SEM image of  $\alpha$ -MnO<sub>2</sub> NPs electrode after first discharge.

## References

- 1 H. Y. Lee, J. B. Goodenough, *J. Solid State Chem.* 1999, **144**, 220.
- 2 X. Wang, Y. Li, *Chem. Eur. J.* 2003, **9**, 300.
- 3 J. Luo, H. T. Zhu, H. M. Fan, J. K. Liang, H. L. Shi, G. H. Rao, J. B. Li, Z. M. Du, Z. X. Shen, *J. Phys. Chem. C*, 2008, **112**, 12594.
